# Supplementary material for: Network-based identification of signature genes KLF6 and SPOCK1 associated with oral submucous fibrosis
Source: PubMed Central journal article supplement — Mol Clin Oncol. 2020 Jan 30;12(4):299–310. doi: 10.3892/mco.2020.1991 (PMC7058035; doi:10.3892/mco.2020.1991), 2020-01-30
Supplement: Supplementary_Data.pdf [file Supplementary_Data.pdf]

Table SI. List of significant module genes identified from differentially expressed genes.

| Gene     | Module color |
|----------|--------------|
| ABTB2    | Black        |
| ACAA2    | Black        |
| ACADS    | Black        |
| ACAT1    | Black        |
| ACSM5    | Black        |
| ACTN3    | Black        |
| ACTRT1   | Black        |
| ADCY1    | Black        |
| ADCY5    | Black        |
| ADH1A    | Black        |
| ADH1C    | Black        |
| ADH5     | Black        |
| ADPRHL1  | Black        |
| AGL      | Black        |
| AGT      | Black        |
| AKR1B1   | Black        |
| ALDH1A1  | Black        |
| ALDH1A3  | Black        |
| ALDH1L1  | Black        |
| AMPD1    | Black        |
| ANGPTL7  | Black        |
| ANK1     | Black        |
| ANKRD1   | Black        |
| ART3     | Black        |
| ART4     | Black        |
| ASB2     | Black        |
| ASB5     | Black        |
| ATP1A2   | Black        |
| ATP2A2   | Black        |
| BIN1     | Black        |
| BVES     | Black        |
| BZW2     | Black        |
| C1orf105 | Black        |
| C3orf18  | Black        |
| C6       | Black        |
| C7orf13  | Black        |
| CACNB1   | Black        |
| CAMK2B   | Black        |
| CAP2     | Black        |
| CARNS1   | Black        |
| CAV3     | Black        |
| CCDC58   | Black        |
| CCDC85A  | Black        |
| CCT6B    | Black        |
| CDH15    | Black        |
| CDHR2    | Black        |
| CFL2     | Black        |
| CHI3L2   | Black        |
| CITED2   | Black        |
| CLDN17   | Black        |
| CLIC5    | Black        |
| CMBL     | Black        |
| CMYA5    | Black        |
| CNTNAP3  | Black        |
| COL6A6   | Black        |

Table SI. Continued.

| Gene          | Module color |
|---------------|--------------|
| COQ10A        | Black        |
| COQ3          | Black        |
| COX7A1        | Black        |
| CPED1         | Black        |
| CRAT          | Black        |
| CRMP1         | Black        |
| CUTC          | Black        |
| CYP1B1        | Black        |
| DACT1         | Black        |
| DDX28         | Black        |
| DIRAS1        | Black        |
| DKFZp779M0652 | Black        |
| DMD           | Black        |
| DMPK          | Black        |
| DOK5          | Black        |
| DOK7          | Black        |
| DTNA          | Black        |
| DUSP10        | Black        |
| DZIP3         | Black        |
| EEF1A2        | Black        |
| EFR3B         | Black        |
| EMX2          | Black        |
| ENPP4         | Black        |
| EPDR1         | Black        |
| ESRRG         | Black        |
| FAM134B       | Black        |
| FAM149B1      | Black        |
| FAM150B       | Black        |
| FAM179A       | Black        |
| FBXO32        | Black        |
| FGF13         | Black        |
| FGF7          | Black        |
| FGFBP2        | Black        |
| FHL1          | Black        |
| FHL3          | Black        |
| FHL5          | Black        |
| FITM1         | Black        |
| FNDC5         | Black        |
| FRY           | Black        |
| FSCB          | Black        |
| FXR1          | Black        |
| FZD5          | Black        |
| G0S2          | Black        |
| GATM          | Black        |
| GBAS          | Black        |
| GCNT3         | Black        |
| GFPT2         | Black        |
| GKAP1         | Black        |
| GLO1          | Black        |
| GLRB          | Black        |
| GLUL          | Black        |
| GMPR          | Black        |
| GPCPD1        | Black        |
| GPRASP2       | Black        |
| GRB14         | Black        |
| GYG1          | Black        |

Table SI. Continued.

| Gene       | Module color |
|------------|--------------|
| H19        | Black        |
| HSPB2      | Black        |
| HSPB3      | Black        |
| IBTK       | Black        |
| IFRD2      | Black        |
| IGF2BP2    | Black        |
| IGSF1      | Black        |
| IL17D      | Black        |
| IL32       | Black        |
| IL36RN     | Black        |
| IVD        | Black        |
| JHDM1D-AS1 | Black        |
| KCNJ15     | Black        |
| KLF15      | Black        |
| KLF9       | Black        |
| KRTAP9-4   | Black        |
| LAMA2      | Black        |
| LINC00667  | Black        |
| LMCD1      | Black        |
| LOC729680  | Black        |
| LOC730098  | Black        |
| LPL        | Black        |
| LRR38      | Black        |
| LRRN1      | Black        |
| LVRN       | Black        |
| LYPD5      | Black        |
| MAMSTR     | Black        |
| MAP3K7CL   | Black        |
| MAP7D1     | Black        |
| MAPK12     | Black        |
| MEF2C      | Black        |
| METTL7B    | Black        |
| MICALCL    | Black        |
| MITF       | Black        |
| MLF1       | Black        |
| MRPL41     | Black        |
| MT1B       | Black        |
| MT2A       | Black        |
| MYL6B      | Black        |
| MYOD1      | Black        |
| MYOM2      | Black        |
| MYOZ2      | Black        |
| NES        | Black        |
| NEXN       | Black        |
| NGEF       | Black        |
| NKAIN2     | Black        |
| NME5       | Black        |
| NOV        | Black        |
| OSBPL6     | Black        |
| PCDH20     | Black        |
| PDE4A      | Black        |
| PDE4DIP    | Black        |
| PDGFA      | Black        |
| PDLIM3     | Black        |
| PDLIM7     | Black        |
| PFKM       | Black        |

Table SI. Continued.

| Gene     | Module color |
|----------|--------------|
| PGM1     | Black        |
| PGPEP1L  | Black        |
| PHKG1    | Black        |
| PHYH     | Black        |
| PKDCC    | Black        |
| PKIG     | Black        |
| PKNOX2   | Black        |
| PLA2G16  | Black        |
| PLA2G4C  | Black        |
| PLAT     | Black        |
| PLCL1    | Black        |
| PLN      | Black        |
| PMP2     | Black        |
| PMP22    | Black        |
| POP5     | Black        |
| POP7     | Black        |
| PPIF     | Black        |
| PPM1A    | Black        |
| PPP2R3B  | Black        |
| PRKCQ    | Black        |
| PRORS1P  | Black        |
| PROX1    | Black        |
| PRR16    | Black        |
| PRUNE2   | Black        |
| PTP4A3   | Black        |
| RAMP1    | Black        |
| RAPGEF5  | Black        |
| RBM24    | Black        |
| RBMS3    | Black        |
| RCAN2    | Black        |
| RGS11    | Black        |
| RHOQ     | Black        |
| RNF150   | Black        |
| RNF157   | Black        |
| RPS4XP16 | Black        |
| RTN2     | Black        |
| RXRG     | Black        |
| RYR1     | Black        |
| S100A2   | Black        |
| S100P    | Black        |
| SAMD4A   | Black        |
| SBDSP1   | Black        |
| SCN4A    | Black        |
| SCP2     | Black        |
| SEC14L5  | Black        |
| SERPINA3 | Black        |
| SERPINA5 | Black        |
| SGCD     | Black        |
| SGCG     | Black        |
| SGMS2    | Black        |
| SH2D4A   | Black        |
| SH3BGR   | Black        |
| SH3YL1   | Black        |
| SHISA2   | Black        |
| SHISA4   | Black        |
| SIK2     | Black        |

Table SI. Continued.

| Gene    | Module color |
|---------|--------------|
| SIX1    | Black        |
| SIX4    | Black        |
| SLC35F3 | Black        |
| SLC41A1 | Black        |
| SLC47A1 | Black        |
| SLC4A7  | Black        |
| SLC8A3  | Black        |
| SMTN    | Black        |
| SNTB1   | Black        |
| SORBS1  | Black        |
| SPATA2  | Black        |
| SPIN4   | Black        |
| SPOCK1  | Black        |
| SPRR2C  | Black        |
| SSSCA1  | Black        |
| STEAP4  | Black        |
| SYNC    | Black        |
| SYNM    | Black        |
| TBX1    | Black        |
| TBX15   | Black        |
| TCEAL7  | Black        |
| TCP10L  | Black        |
| TEAD4   | Black        |
| TIMP3   | Black        |
| TLN2    | Black        |
| TMEM182 | Black        |
| TMEM201 | Black        |
| TMEM38A | Black        |
| TMEM38B | Black        |
| TMEM61  | Black        |
| TMEM88  | Black        |
| TMOD1   | Black        |
| TNS1    | Black        |
| TPM1    | Black        |
| TPM2    | Black        |
| TRDN    | Black        |
| TRIM55  | Black        |
| TSPYL5  | Black        |
| UBFD1   | Black        |
| UBR3    | Black        |
| USP13   | Black        |
| VGLL2   | Black        |
| XYLT1   | Black        |
| ZAK     | Black        |
| ZBTB47  | Black        |
| ZFPM2   | Black        |
| ZNF358  | Black        |
| ZNF385B | Black        |
| ABCG1   | Blue         |
| ABI3BP  | Blue         |
| ACTG2   | Blue         |
| ADORA3  | Blue         |
| AJAP1   | Blue         |
| ALDH1B1 | Blue         |
| ANK2    | Blue         |
| AQP10   | Blue         |

Table SI. Continued.

| Gene     | Module color |
|----------|--------------|
| ARL14    | Blue         |
| ASTN1    | Blue         |
| ATP2C2   | Blue         |
| BATF3    | Blue         |
| BPIFC    | Blue         |
| C1QA     | Blue         |
| C1QC     | Blue         |
| C3       | Blue         |
| C3AR1    | Blue         |
| C6orf15  | Blue         |
| CADM3    | Blue         |
| CALML5   | Blue         |
| CAMK1    | Blue         |
| CARD17   | Blue         |
| CCDC80   | Blue         |
| CCL17    | Blue         |
| CCL18    | Blue         |
| CCL23    | Blue         |
| CCR1     | Blue         |
| CD14     | Blue         |
| CD300C   | Blue         |
| CDC42EP2 | Blue         |
| CFH      | Blue         |
| CILP     | Blue         |
| CLEC4G   | Blue         |
| CLSTN2   | Blue         |
| CMKLR1   | Blue         |
| CNN1     | Blue         |
| COCH     | Blue         |
| COLEC12  | Blue         |
| COLGALT2 | Blue         |
| CREB5    | Blue         |
| CRIP1    | Blue         |
| CRLF1    | Blue         |
| CSF1R    | Blue         |
| CSPG4    | Blue         |
| CTSZ     | Blue         |
| CYP27B1  | Blue         |
| DAB2     | Blue         |
| DBNDD2   | Blue         |
| DDN      | Blue         |
| DMKN     | Blue         |
| DOCK11   | Blue         |
| DPP4     | Blue         |
| DPT      | Blue         |
| EMP3     | Blue         |
| ENPP2    | Blue         |
| ESYT3    | Blue         |
| F10      | Blue         |
| FADS1    | Blue         |
| FAIM2    | Blue         |
| FAM102B  | Blue         |
| FAM198B  | Blue         |
| FAM65C   | Blue         |
| FBN2     | Blue         |
| FCGR2A   | Blue         |

Table SI. Continued.

| Gene     | Module color |
|----------|--------------|
| FEZ1     | Blue         |
| FGF2     | Blue         |
| FGL2     | Blue         |
| FILIP1L  | Blue         |
| FOLR2    | Blue         |
| FPR3     | Blue         |
| FSIP1    | Blue         |
| FSTL3    | Blue         |
| FXVD6    | Blue         |
| GCNT1    | Blue         |
| GDF10    | Blue         |
| GDPD5    | Blue         |
| GFRA1    | Blue         |
| GFRA2    | Blue         |
| GJD3     | Blue         |
| GLI1     | Blue         |
| GLIPR2   | Blue         |
| GPBAR1   | Blue         |
| GPC3     | Blue         |
| GREM2    | Blue         |
| GTSF1    | Blue         |
| HSPG2    | Blue         |
| HTR3A    | Blue         |
| ISLR     | Blue         |
| ITGAM    | Blue         |
| KCNMB4   | Blue         |
| KIAA1644 | Blue         |
| KRT222   | Blue         |
| LAMC3    | Blue         |
| LCE1C    | Blue         |
| LCE2D    | Blue         |
| LCE3E    | Blue         |
| LILRB2   | Blue         |
| LILRB5   | Blue         |
| LIPG     | Blue         |
| LMO3     | Blue         |
| LOR      | Blue         |
| LYVE1    | Blue         |
| MAMDC2   | Blue         |
| MARCO    | Blue         |
| MFAP5    | Blue         |
| MGP      | Blue         |
| MMP16    | Blue         |
| MS4A14   | Blue         |
| MYADM    | Blue         |
| NAV3     | Blue         |
| NLRP3    | Blue         |
| NPB      | Blue         |
| NPTX2    | Blue         |
| NR2F1    | Blue         |
| OSM      | Blue         |
| P2RY14   | Blue         |
| PCOLCE2  | Blue         |
| PDGFRL   | Blue         |
| PLEKHA4  | Blue         |
| PLIN4    | Blue         |

Table SI. Continued.

| Gene     | Module color |
|----------|--------------|
| PRRT2    | Blue         |
| PTGS1    | Blue         |
| PTHLH    | Blue         |
| PTPRE    | Blue         |
| PVRL3    | Blue         |
| RAB3IL1  | Blue         |
| RENBP    | Blue         |
| RFPL1    | Blue         |
| RFX2     | Blue         |
| RNASE1   | Blue         |
| RNASE7   | Blue         |
| RRAD     | Blue         |
| RSPO3    | Blue         |
| S1PR3    | Blue         |
| SCG5     | Blue         |
| SCN9A    | Blue         |
| SDK2     | Blue         |
| SIGLEC9  | Blue         |
| SLIT2    | Blue         |
| STATH    | Blue         |
| STC1     | Blue         |
| SV2B     | Blue         |
| SYNDIG1  | Blue         |
| TBXAS1   | Blue         |
| TINAGL1  | Blue         |
| TLR4     | Blue         |
| TMEM108  | Blue         |
| TMEM176A | Blue         |
| TMEM8A   | Blue         |
| TNC      | Blue         |
| TPPP3    | Blue         |
| TPSG1    | Blue         |
| TREM2    | Blue         |
| TSPAN2   | Blue         |
| TUBB2A   | Blue         |
| VENTX    | Blue         |
| VSIG4    | Blue         |
| WDR49    | Blue         |
| WFDC12   | Blue         |
| WFDC5    | Blue         |
| AASDH    | Green        |
| ABCC1    | Green        |
| ACOT7    | Green        |
| ACP5     | Green        |
| ACSF2    | Green        |
| ACTL9    | Green        |
| ADA      | Green        |
| ADAM19   | Green        |
| ADAM8    | Green        |
| ADAMTS5  | Green        |
| ADAP1    | Green        |
| ADNP     | Green        |
| ADORA1   | Green        |
| AGA      | Green        |
| AGAP11   | Green        |
| AKAP13   | Green        |

Table SI. Continued.

| Gene       | Module color |
|------------|--------------|
| AKIRIN2    | Green        |
| AKT3       | Green        |
| ALCAM      | Green        |
| ALG11      | Green        |
| ALG9       | Green        |
| ALOX5AP    | Green        |
| ALOXE3     | Green        |
| ANGPTL4    | Green        |
| ANKDD1A    | Green        |
| ANKRD30B   | Green        |
| ANXA6      | Green        |
| AOAH       | Green        |
| APOBR      | Green        |
| APOD       | Green        |
| APOM       | Green        |
| ARFIP1     | Green        |
| ARHGAP31   | Green        |
| ARHGDIA    | Green        |
| ARHGEF12   | Green        |
| ARPIN      | Green        |
| ARRB2      | Green        |
| ARSB       | Green        |
| ASNSD1     | Green        |
| ASPHD2     | Green        |
| ASPRV1     | Green        |
| ASXL3      | Green        |
| ATL1       | Green        |
| ATP1A1-AS1 | Green        |
| ATP6V0A2   | Green        |
| AURKAIP1   | Green        |
| B3GALT5    | Green        |
| B4GALNT1   | Green        |
| BAG4       | Green        |
| BBS9       | Green        |
| BCAT1      | Green        |
| BHMT2      | Green        |
| BOP1       | Green        |
| BRK1       | Green        |
| BTG2       | Green        |
| C14orf80   | Green        |
| C16orf74   | Green        |
| C17orf100  | Green        |
| C17orf96   | Green        |
| C1orf162   | Green        |
| C1orf56    | Green        |
| C1QB       | Green        |
| C3orf36    | Green        |
| C5orf22    | Green        |
| C9orf84    | Green        |
| CA2        | Green        |
| CACHD1     | Green        |
| CAPN13     | Green        |
| CARD10     | Green        |
| CD209      | Green        |
| CD226      | Green        |
| CD300A     | Green        |

Table SI. Continued.

| Gene       | Module color |
|------------|--------------|
| CD3D       | Green        |
| CD74       | Green        |
| CD83       | Green        |
| CD84       | Green        |
| CD86       | Green        |
| CDH19      | Green        |
| CEBPB      | Green        |
| CEP295     | Green        |
| CFP        | Green        |
| CH25H      | Green        |
| CHI3L1     | Green        |
| CLEC12A    | Green        |
| CLEC4A     | Green        |
| CLEC5A     | Green        |
| CLHC1      | Green        |
| CLIC2      | Green        |
| CLPTM1     | Green        |
| CPVL       | Green        |
| CRACR2A    | Green        |
| CRHBP      | Green        |
| CST7       | Green        |
| CTSS       | Green        |
| CTXN1      | Green        |
| CYB5D2     | Green        |
| CYB5R2     | Green        |
| CYBB       | Green        |
| CYFIP2     | Green        |
| DCTPP1     | Green        |
| DDA1       | Green        |
| DDX19A     | Green        |
| DDX51      | Green        |
| DENND1B    | Green        |
| DFNA5      | Green        |
| DFNB59     | Green        |
| DOCK5      | Green        |
| DOK2       | Green        |
| DRAP1      | Green        |
| DUSP5      | Green        |
| DUSP7      | Green        |
| EBF2       | Green        |
| EHD4       | Green        |
| EIF4A2     | Green        |
| EIF5B      | Green        |
| ELOVL1     | Green        |
| ENTPD7     | Green        |
| EPB41L2    | Green        |
| EPHB2      | Green        |
| EPPK1      | Green        |
| ERCC6      | Green        |
| ERGIC3     | Green        |
| ERLIN2     | Green        |
| FAM13A-AS1 | Green        |
| FAM181B    | Green        |
| FAM188A    | Green        |
| FAM3A      | Green        |
| FASTKD3    | Green        |

Table SI. Continued.

| Gene     | Module color |
|----------|--------------|
| FAT1     | Green        |
| FBXL3    | Green        |
| FCER1G   | Green        |
| FCGR2B   | Green        |
| FCHO1    | Green        |
| FCN1     | Green        |
| FERMT3   | Green        |
| FHOD1    | Green        |
| FLCN     | Green        |
| FLRT3    | Green        |
| FOXD1    | Green        |
| FOXD2    | Green        |
| FUCA1    | Green        |
| FUT11    | Green        |
| GALM     | Green        |
| GALNT6   | Green        |
| GATA3    | Green        |
| GATAD2B  | Green        |
| GCFC2    | Green        |
| GCNT2    | Green        |
| GEMIN6   | Green        |
| GFRA3    | Green        |
| GIMAP6   | Green        |
| GIMAP8   | Green        |
| GNE      | Green        |
| GNG2     | Green        |
| GNG7     | Green        |
| GNLY     | Green        |
| GNMT     | Green        |
| GOLGA2P6 | Green        |
| GOLGA6L2 | Green        |
| GOSR2    | Green        |
| GPR132   | Green        |
| GPR34    | Green        |
| GSPT1    | Green        |
| GTF2F2   | Green        |
| GUSBP2   | Green        |
| H1FX     | Green        |
| HAVCR2   | Green        |
| HCK      | Green        |
| HCST     | Green        |
| HECW2    | Green        |
| HES6     | Green        |
| HINT3    | Green        |
| HIST1H1B | Green        |
| HIVEP1   | Green        |
| HK3      | Green        |
| HLA-DMA  | Green        |
| HLA-DMB  | Green        |
| HLA-DPA1 | Green        |
| HLA-DPB1 | Green        |
| HLA-DQA1 | Green        |
| HLA-DRB1 | Green        |
| HLA-DRB5 | Green        |
| HMOX1    | Green        |
| HOMER3   | Green        |

Table SI. Continued.

| Gene         | Module color |
|--------------|--------------|
| HOXD12       | Green        |
| HSDL1        | Green        |
| HSPH1        | Green        |
| HTR2B        | Green        |
| HYAL4        | Green        |
| IFI30        | Green        |
| IGF1         | Green        |
| IGFBP6       | Green        |
| IGSF11       | Green        |
| IGSF6        | Green        |
| IL10RB       | Green        |
| IL23A        | Green        |
| IL27RA       | Green        |
| IL36G        | Green        |
| INPP4B       | Green        |
| INPP5D       | Green        |
| IQGAP2       | Green        |
| IRF8         | Green        |
| IRS1         | Green        |
| ITGA3        | Green        |
| ITGAX        | Green        |
| ITGB2        | Green        |
| ITPKB        | Green        |
| JUNB         | Green        |
| KCNA5        | Green        |
| KCNJ10       | Green        |
| KIAA1324L    | Green        |
| KIAA1522     | Green        |
| KIAA1958     | Green        |
| KLF12        | Green        |
| KLF13        | Green        |
| KLF6         | Green        |
| KLK5         | Green        |
| KLK9         | Green        |
| KRT17        | Green        |
| KRT2         | Green        |
| KRT73        | Green        |
| KRT75        | Green        |
| KRT86        | Green        |
| LAIR2        | Green        |
| LCE3D        | Green        |
| LDHB         | Green        |
| LGMN         | Green        |
| LINC00265    | Green        |
| LINC00843    | Green        |
| LINC00969    | Green        |
| LOC100128288 | Green        |
| LOC100131294 | Green        |
| LOC100507599 | Green        |
| LOC643438    | Green        |
| LOC644387    | Green        |
| LOC730101    | Green        |
| LRFN4        | Green        |
| LRIG3        | Green        |
| LRRC1        | Green        |
| LRRC59       | Green        |

Table SI. Continued.

| Gene    | Module color |
|---------|--------------|
| LSM10   | Green        |
| LXN     | Green        |
| LYAR    | Green        |
| LYRM1   | Green        |
| LYZ     | Green        |
| MARCH3' | Green        |
| MARCH5' | Green        |
| MC1R    | Green        |
| MCOLN2  | Green        |
| MED12   | Green        |
| MED13L  | Green        |
| MED25   | Green        |
| MIA     | Green        |
| MICA    | Green        |
| MILR1   | Green        |
| MMP25   | Green        |
| MOB3C   | Green        |
| MPEG1   | Green        |
| MTHFD1L | Green        |
| MTIF2   | Green        |
| MTX3    | Green        |
| MXD1    | Green        |
| MYO5A   | Green        |
| MYO7A   | Green        |
| MYOF    | Green        |
| NAPB    | Green        |
| NAPG    | Green        |
| NAPSA   | Green        |
| NAPSB   | Green        |
| NCF2    | Green        |
| NCF4    | Green        |
| NDP     | Green        |
| NDUFA9  | Green        |
| NDUFB1  | Green        |
| NELL1   | Green        |
| NEURL1B | Green        |
| NFATC1  | Green        |
| NFE2L3  | Green        |
| NFKB2   | Green        |
| NFKBIE  | Green        |
| NPR2    | Green        |
| NR1H3   | Green        |
| NRP2    | Green        |
| NRXN1   | Green        |
| NUDCD2  | Green        |
| OLFM1   | Green        |
| OLR1    | Green        |
| PANK4   | Green        |
| PAQR8   | Green        |
| PARP12  | Green        |
| PCBP2   | Green        |
| PCMTD1  | Green        |
| PDE11A  | Green        |
| PDE7A   | Green        |
| PDZD4   | Green        |
| PGM2L1  | Green        |

Table SI. Continued.

| Gene      | Module color |
|-----------|--------------|
| PI15      | Green        |
| PI3       | Green        |
| PIGW      | Green        |
| PLA2G3    | Green        |
| PLCXD1    | Green        |
| PLEKHG1   | Green        |
| PLEKHO1   | Green        |
| PLP1      | Green        |
| PLVAP     | Green        |
| PNISR     | Green        |
| PNP       | Green        |
| PODXL     | Green        |
| PODXL2    | Green        |
| POLR1D    | Green        |
| POTEE     | Green        |
| PPP1R13B  | Green        |
| PRKAR2B   | Green        |
| PRKCZ     | Green        |
| PRMT3     | Green        |
| PROCR     | Green        |
| PROM1     | Green        |
| PSG6      | Green        |
| PSORS1C2  | Green        |
| PTAFR     | Green        |
| PTPRJ     | Green        |
| PTPRO     | Green        |
| PYGB      | Green        |
| QDPR      | Green        |
| RAB2A     | Green        |
| RAC3      | Green        |
| RAD54B    | Green        |
| RASSF2    | Green        |
| RASSF4    | Green        |
| RBBP4     | Green        |
| RBM38     | Green        |
| RBPJ      | Green        |
| RCSD1     | Green        |
| RELB      | Green        |
| RELL1     | Green        |
| RERE      | Green        |
| REV3L     | Green        |
| RHOF      | Green        |
| RHOT1     | Green        |
| RHOU      | Green        |
| RNF113A   | Green        |
| RNF39     | Green        |
| RPL21P44  | Green        |
| RPL32P3   | Green        |
| RPS15AP11 | Green        |
| RRP36     | Green        |
| RTN1      | Green        |
| RUFY2     | Green        |
| RUNDC3B   | Green        |
| S100A7A   | Green        |
| SCNN1D    | Green        |
| SECISBP2L | Green        |

Table SI. Continued.

| Gene     | Module color |
|----------|--------------|
| SEMA3B   | Green        |
| SEMA3C   | Green        |
| SENP5    | Green        |
| SEPT3'   | Green        |
| SEPT9'   | Green        |
| SERPINB8 | Green        |
| SERPINB9 | Green        |
| SH2B3    | Green        |
| SH2D2A   | Green        |
| SH2D5    | Green        |
| SH3TC1   | Green        |
| SHANK1   | Green        |
| SHC4     | Green        |
| SIGLEC10 | Green        |
| SLAMF8   | Green        |
| SLC15A3  | Green        |
| SLC17A8  | Green        |
| SLC22A3  | Green        |
| SLC22A31 | Green        |
| SLC25A13 | Green        |
| SLC25A44 | Green        |
| SLC26A11 | Green        |
| SLC2A8   | Green        |
| SLC35F1  | Green        |
| SLC39A11 | Green        |
| SLC4A5   | Green        |
| SLC6A12  | Green        |
| SLC7A6   | Green        |
| SLC7A7   | Green        |
| SLC9A7   | Green        |
| SMARCA2  | Green        |
| SMARCE1  | Green        |
| SMIM10L1 | Green        |
| SMOX     | Green        |
| SMU1     | Green        |
| SNAPC3   | Green        |
| SNX10    | Green        |
| SOD2     | Green        |
| SORCS1   | Green        |
| SP2      | Green        |
| SPAG1    | Green        |
| SPI1     | Green        |
| SPIRE1   | Green        |
| SPRR2G   | Green        |
| SPTY2D1  | Green        |
| SSFA2    | Green        |
| SSH2     | Green        |
| ST3GAL5  | Green        |
| STAG1    | Green        |
| STAG2    | Green        |
| STAT5A   | Green        |
| STX11    | Green        |
| STXBP1   | Green        |
| SUCNR1   | Green        |
| TAX1BP1  | Green        |
| TBC1D4   | Green        |

Table SI. Continued.

| Gene      | Module color |
|-----------|--------------|
| TBRG4     | Green        |
| TBX18     | Green        |
| TCEB1P29  | Green        |
| TCN1      | Green        |
| TFDP3     | Green        |
| TFF3      | Green        |
| TGFBR1    | Green        |
| THSD7B    | Green        |
| THYN1     | Green        |
| TIGD2     | Green        |
| TLR7      | Green        |
| TLR8      | Green        |
| TM6SF1    | Green        |
| TM9SF3    | Green        |
| TMEM110   | Green        |
| TMEM158   | Green        |
| TMEM42    | Green        |
| TMEM59L   | Green        |
| TMEM86A   | Green        |
| TMEM98    | Green        |
| TMEM99    | Green        |
| TMPRSS13  | Green        |
| TNFAIP2   | Green        |
| TNFRSF12A | Green        |
| TNFRSF1B  | Green        |
| TNFSF13B  | Green        |
| TNFSF4    | Green        |
| TOPBP1    | Green        |
| TPP1      | Green        |
| TRAPPC6B  | Green        |
| TRAPPC8   | Green        |
| TRIM47    | Green        |
| TRIM8     | Green        |
| TSC22D4   | Green        |
| TSPAN33   | Green        |
| TSSK2     | Green        |
| TUBB3     | Green        |
| TUSC3     | Green        |
| TYROBP    | Green        |
| UBA2      | Green        |
| UBASH3B   | Green        |
| UBQLN1    | Green        |
| UCHL1     | Green        |
| UCP2      | Green        |
| USP24     | Green        |
| USP6      | Green        |
| VIP       | Green        |
| VNN3      | Green        |
| VPS54     | Green        |
| WDR66     | Green        |
| WDR75     | Green        |
| WHSC1L1   | Green        |
| WNT2      | Green        |
| WWP1P1    | Green        |
| XKR4      | Green        |
| YES1      | Green        |

Table SI. Continued.

| Gene     | Module color |
|----------|--------------|
| YTHDF1   | Green        |
| ZDHHC23  | Green        |
| ZFP36L2  | Green        |
| ZMAT5    | Green        |
| ZNF10    | Green        |
| ZNF138   | Green        |
| ZNF252P  | Green        |
| ZNF671   | Green        |
| ZNF812   | Green        |
| ZNF821   | Green        |
| ZNF839   | Green        |
| ZNHIT2   | Green        |
| ZNRF3    | Green        |
| ZP3      | Green        |
| ADAMDEC1 | Greenyellow  |
| ARTN     | Greenyellow  |
| BATF     | Greenyellow  |
| BATF2    | Greenyellow  |
| BIRC3    | Greenyellow  |
| BLK      | Greenyellow  |
| CD37     | Greenyellow  |
| CD5      | Greenyellow  |
| CHST13   | Greenyellow  |
| CRYBB2   | Greenyellow  |
| CTLA4    | Greenyellow  |
| CTSW     | Greenyellow  |
| CXCL11   | Greenyellow  |
| CXCL9    | Greenyellow  |
| CXCR6    | Greenyellow  |
| DDX60    | Greenyellow  |
| DENND1A  | Greenyellow  |
| EGR3     | Greenyellow  |
| EPSTI1   | Greenyellow  |
| F5       | Greenyellow  |
| FABP4    | Greenyellow  |
| FLT3     | Greenyellow  |
| FMNL3    | Greenyellow  |
| GBP1     | Greenyellow  |
| GBP5     | Greenyellow  |
| GEN1     | Greenyellow  |
| GLIPR1   | Greenyellow  |
| GPR55    | Greenyellow  |
| GZMB     | Greenyellow  |
| HAPLN3   | Greenyellow  |
| HOXA5    | Greenyellow  |
| HOXC13   | Greenyellow  |
| HOXD11   | Greenyellow  |
| ICOS     | Greenyellow  |
| IDO1     | Greenyellow  |
| IFI35    | Greenyellow  |
| IFI44L   | Greenyellow  |
| IFIT1    | Greenyellow  |
| IL18RAP  | Greenyellow  |
| IL1F10   | Greenyellow  |
| IL2RA    | Greenyellow  |
| IL2RG    | Greenyellow  |

Table SI. Continued.

| Gene         | Module color |
|--------------|--------------|
| ISG15        | Greenyellow  |
| ITK          | Greenyellow  |
| KCTD14       | Greenyellow  |
| KHDC1L       | Greenyellow  |
| KLRD1        | Greenyellow  |
| LAG3         | Greenyellow  |
| LAP3         | Greenyellow  |
| LAP3P2       | Greenyellow  |
| LINC01943    | Greenyellow  |
| LOC100652818 | Greenyellow  |
| MARCH1'      | Greenyellow  |
| NELL2        | Greenyellow  |
| OASL         | Greenyellow  |
| ODC1         | Greenyellow  |
| PACSIN1      | Greenyellow  |
| PARP15       | Greenyellow  |
| PDCD1        | Greenyellow  |
| PDE3B        | Greenyellow  |
| PIK3AP1      | Greenyellow  |
| PLA2G7       | Greenyellow  |
| PLEK         | Greenyellow  |
| PLSCR1       | Greenyellow  |
| PNMA3        | Greenyellow  |
| PNPLA1       | Greenyellow  |
| PRAME        | Greenyellow  |
| PTPRC        | Greenyellow  |
| RAB20        | Greenyellow  |
| RAB33A       | Greenyellow  |
| RSAD2        | Greenyellow  |
| S100A12      | Greenyellow  |
| SAMSN1       | Greenyellow  |
| SH2D1B       | Greenyellow  |
| SIRPG        | Greenyellow  |
| SLA2         | Greenyellow  |
| SLAIN1       | Greenyellow  |
| SOAT1        | Greenyellow  |
| SPIB         | Greenyellow  |
| SPINK6       | Greenyellow  |
| SPOCK2       | Greenyellow  |
| STAG3L4      | Greenyellow  |
| STAT1        | Greenyellow  |
| TCL1A        | Greenyellow  |
| TNFRSF8      | Greenyellow  |
| TNFRSF9      | Greenyellow  |
| TREX2        | Greenyellow  |
| VCAM1        | Greenyellow  |
| WARS         | Greenyellow  |
| WISP3        | Greenyellow  |
| ZAP70        | Greenyellow  |

Table SII. Unique signature genes (47) from all modules with their corresponding ES score.

| Signature genes | Combined ES score | Module      |
|-----------------|-------------------|-------------|
| ADA             | 0.1535            | Green       |
| ALOX5AP         | 0.86933           | Green       |
| BAG4            | -0.021795         | Green       |
| C1QB            | 1.6505            | Green       |
| FAT1            | 0.82347           | Green       |
| FCN1            | 0.15685           | Green       |
| FUCA1           | 0.29294           | Green       |
| GCNT2           | -0.016758         | Green       |
| GNG7            | -0.060834         | Green       |
| GTF2F2          | 0.35585           | Green       |
| KLF6            | -0.75323          | Green       |
| LDHB            | 1.4396            | Green       |
| MMP25           | 0.038352          | Green       |
| NDUFB1          | 0.015749          | Green       |
| NRXN1           | 0.0064235         | Green       |
| PODXL           | -0.10441          | Green       |
| PODXL2          | 0.005212          | Green       |
| SH2B3           | 0.49841           | Green       |
| TPP1            | 0.216             | Green       |
| TRIM8           | 0.39469           | Green       |
| TUSC3           | -0.044803         | Green       |
| ACAA2           | -0.20643          | Black       |
| ADH5            | 0.054609          | Black       |
| ALDH1A1         | 0.32811           | Black       |
| ALDH1L1         | 0.062755          | Black       |
| ANKRD1          | 0.040342          | Black       |
| FHL1            | 5.1342            | Black       |
| GYG1            | 1.4059            | Black       |
| IVD             | 0.038259          | Black       |
| PLAT            | 0.38943           | Black       |
| SCP2            | -0.0043795        | Black       |
| SERPINA5        | 0.095764          | Black       |
| SPOCK1          | 0.090139          | Black       |
| ANK2            | 0.08779           | Blue        |
| C3AR1           | 0.06259           | Blue        |
| CCR1            | 0.086612          | Blue        |
| CD14            | 1.946             | Blue        |
| CSPG4           | 0.15979           | Blue        |
| DPP4            | 0.043             | Blue        |
| FCGR2A          | 0.082113          | Blue        |
| SCN9A           | 0.032916          | Blue        |
| SV2B            | 0.027945          | Blue        |
| TINAGL1         | 0.0064152         | Blue        |
| OASL            | 0.097903          | Greenyellow |
| F5              | 0.056312          | Greenyellow |
| ODC1            | 2.615             | Greenyellow |
| TNFRSF8         | 0.0070385         | Greenyellow |

ES, effect size.
